# Supplementary material
Source: PubMed Central journal article supplement (PMC6372721)
Supplement: 41386_2018_177_MOESM3_ESM.pdf [file 41386_2018_177_MOESM3_ESM.pdf]

**Supplementary Table 1** Chamber time and total travel distance in social interaction test of mice with chronic administration of JHU-083

| Group        | Chamber with empty cage (s) | Chamber with Stranger1 cage (s) | Center Chamber (s) | Total travel distance (cm) |
|--------------|-----------------------------|---------------------------------|--------------------|----------------------------|
| Ctr+Vehicle  | 225.56±12.31                | 280.90±6.29                     | 93.54±14.14        | 2901.40±142.05             |
| CSDS+Vehicle | 215.93±6.62                 | 231.09±7.74                     | 152.97±8.45        | 3149.75±190.27             |
| Ctr+JHU-083  | 216.83±9.77                 | 281.64±8.55                     | 101.53±12.35       | 2987.23±452.40             |
| CSDS+JHU-083 | 205.55±9.67                 | 253.00±10.36                    | 141.45±10.24       | 3158.78±197.48             |

Data are presented as the mean ± SEM. Ctr + vehicle, n = 6; Ctr + JHU-083, n = 6; CSDS + vehicle, n = 11; CSDS + JHU-083, n = 10.

**Supplementary Table 2** Chamber time and total travel distance in social novelty test of mice with chronic administration of JHU-083

| Group        | Chamber with Stranger1 cage (s) | Chamber with Stranger2 cage (s) | Center Chamber (s) | Total travel distance (cm) |
|--------------|---------------------------------|---------------------------------|--------------------|----------------------------|
| Ctr+Vehicle  | 197.12±14.01                    | 299.95±17.56                    | 102.93±12.71       | 2488.78±244.98             |
| CSDS+Vehicle | 187.23±20.21                    | 193.71±23.84                    | 219.06±33.04       | 3128.18±227.27             |
| Ctr+JHU-083  | 184.33±20.13                    | 292.40±15.19                    | 123.27±22.44       | 2788.27±495.05             |
| CSDS+JHU-083 | 174.70±20.57                    | 204.63±26.43                    | 220.67±41.32       | 2768.29±83.71              |

Data are presented as the mean ± SEM. Ctr + vehicle, n = 6; Ctr + JHU-083, n = 6; CSDS + vehicle, n = 11; CSDS + JHU-083, n = 10.
