# Supplementary material
Source: PubMed Central journal article supplement (PMC6372721)
Supplement: 41386_2018_177_MOESM4_ESM.pdf [file 41386_2018_177_MOESM4_ESM.pdf]

**Supplementary Table 3** Chamber time and total travel distance in social interaction test of mice with acute administration of JHU-083

| Group        | Chamber with empty cage (s) | Chamber with Stranger1 cage (s) | Center Chamber (s) | Total travel distance (cm) |
|--------------|-----------------------------|---------------------------------|--------------------|----------------------------|
| Ctr+Vehicle  | 172.76±16.21                | 327.01±16.47                    | 100.23±6.58        | 2858.36±247.72             |
| CSDS+Vehicle | 251.35±31.36                | 256.34±32.04                    | 92.32±5.63         | 2765.10±281.00             |
| Ctr+JHU-083  | 194.58±12.79                | 307.45±5.46                     | 97.97±11.27        | 3176.32±442.32             |
| CSDS+JHU-083 | 207.30±24.16                | 303.94±24.46                    | 88.76±8.72         | 2667.46±282.08             |

Data are presented as the mean ± SEM. Ctr + vehicle, n = 10; Ctr + JHU-083, n = 10; CSDS + vehicle, n = 11; CSDS + JHU-083, n = 11.

**Supplementary Table 4** Chamber time and total travel distance in social novelty test of mice with acute administration of JHU-083

| Group        | Chamber with Stranger1 cage (s) | Chamber with Stranger2 cage (s) | Center Chamber (s) | Total travel distance (cm) |
|--------------|---------------------------------|---------------------------------|--------------------|----------------------------|
| Ctr+Vehicle  | 210.31±13.25                    | 279.35±16.53                    | 110.34±11.54       | 2975.96±301.41             |
| CSDS+Vehicle | 223.95±9.67                     | 248.00±13.03                    | 128.05±9.12        | 2819.99±418.73             |
| Ctr+JHU-083  | 192.96±17.40                    | 276.06±16.65                    | 130.98±15.73       | 3698.45±606.82             |
| CSDS+JHU-083 | 235.69±15.98                    | 239.31±12.59                    | 125.00±11.10       | 2481.23±142.20             |

Data are presented as the mean ± SEM. Ctr + vehicle, n = 10; Ctr + JHU-083, n = 10; CSDS + vehicle, n = 11; CSDS + JHU-083, n = 11.
