# Supplementary material
Source: PubMed Central journal article supplement (PMC6372721)

**a**

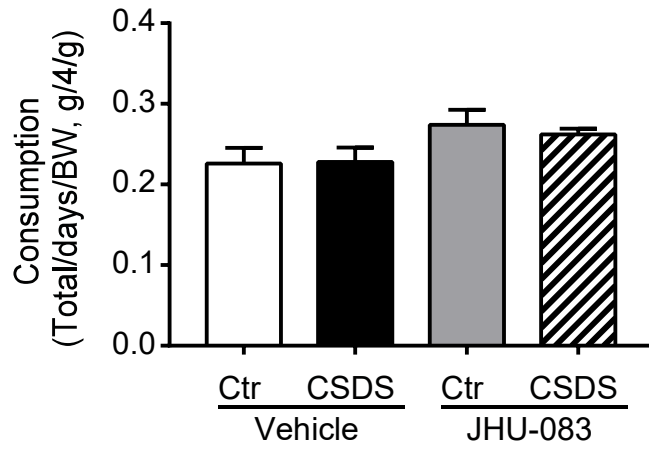

**b**

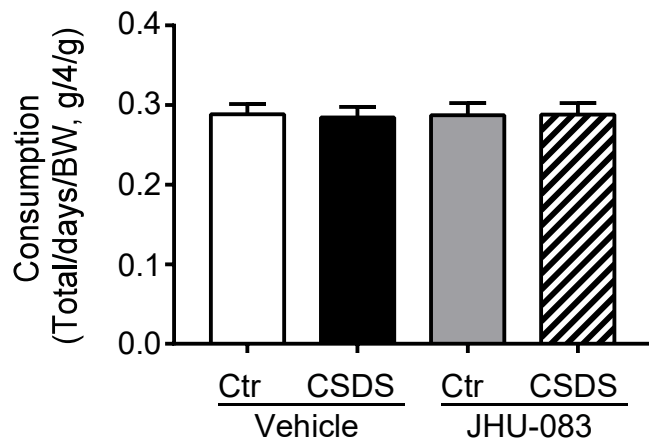

Supplement: 41386_2018_177_MOESM1_ESM.pdf [file 41386_2018_177_MOESM1_ESM.pdf]

**a**

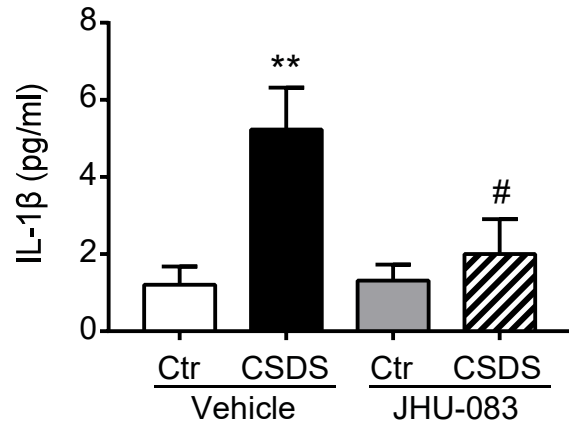

**b**

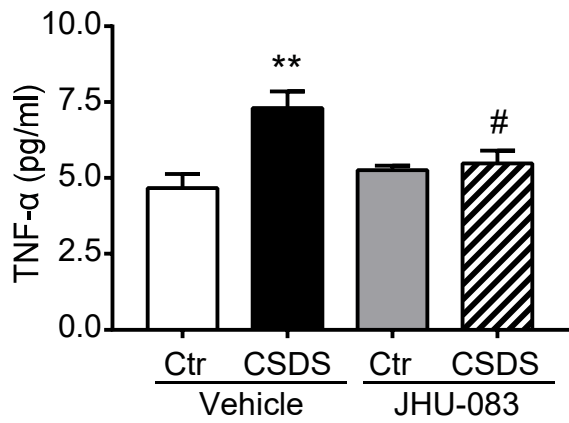

**c**

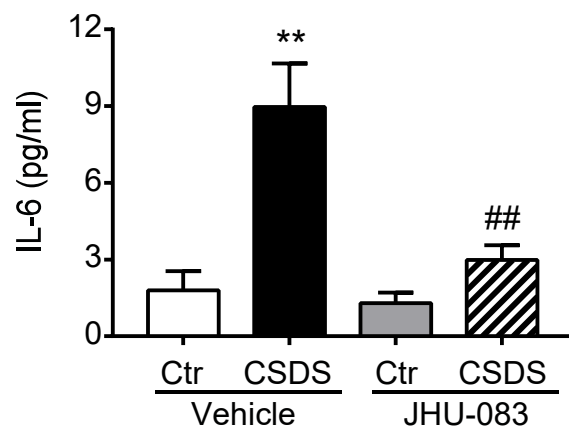

Supplement: 41386_2018_177_MOESM2_ESM.pdf [file 41386_2018_177_MOESM2_ESM.pdf]
